# Supplementary material for: FDA-Approved Excipient N,N-Dimethylacetamide Attenuates Inflammatory Bowel Disease in In-Vitro and In-Vivo Models
Source: Research Square preprint supplement (doi:10.21203/rs.3.rs-948100/v1), 2021-10-13
Supplement: Supplementary file 1 [file 70cb9ca1a316bcab21ca7ffb.docx]

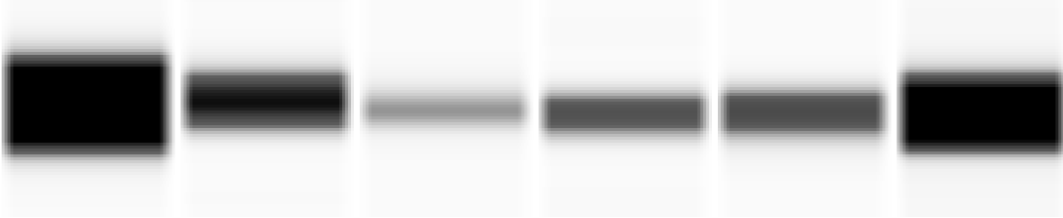


**IB**


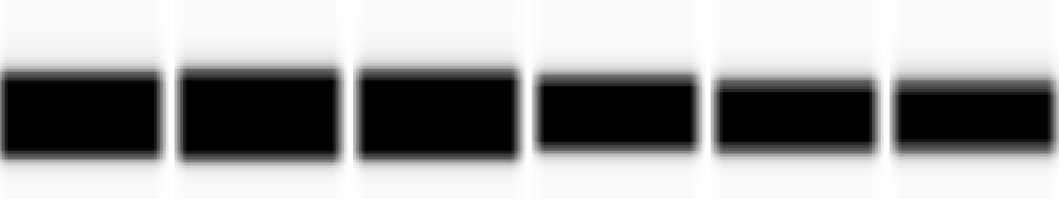


**GAPDH**

Minutes: 0 15 30 60 90 120

Supplementary Figure 4. IkBa degradation timeline. Immunoblots of IkBa in lysates from THP-1 cells stimulated with 1 g mL-1 LPS for various time periods, as indicated.
